# Supplementary material for: DFT studies on the heterogeneous oxidation of SO2 by oxygen functional groups on graphene
Source: Royal Society of Chemistry journal article supplement (doi:10.1039/c6cp06665h), 2016-01-01
Supplement: c6cp06665h1.pdf [file c6cp06665h1.pdf]

## Electronic supplementary information (ESI)

# DFT Studies on the Heterogeneous Oxidation of SO<sub>2</sub> by Oxygen Functional Groups on Graphene

Guangzhi He<sup>1</sup> and Hong He<sup>1,2\*</sup>

1. State Key Joint Laboratory of Environment Simulation and Pollution Control, Research Center for Eco-Environmental Sciences, Chinese Academy of Sciences, Beijing 100085, China
2. Center for Excellence in Regional Atmospheric Environment, Institute of Urban Environment, Chinese Academy of Sciences, Xiamen 361021, China
3. University of Chinese Academy of Sciences, Beijing 100049, China

\*Corresponding author. Tel: +86-10-62849123; Fax: +86-10-62849123; E-mail: honghe@rcees.ac.cn

| List of ESI |                                                                                                         | Page |
|-------------|---------------------------------------------------------------------------------------------------------|------|
| Table S1    | Coordinates of the reactant, transition states, intermediate, and product for SO <sub>2</sub> oxidation | S2   |
| Table S2    | Coordinates of the reactant, transition state, and product for H <sub>2</sub> SO <sub>3</sub> oxidation | S6   |
| Fig. S1     | IRC path of the first reaction step for SO <sub>2</sub> oxidation                                       | S9   |
| Fig. S2     | IRC path of the second reaction step for SO <sub>2</sub> oxidation                                      | S10  |
| Fig. S3     | IRC path for H <sub>2</sub> SO <sub>3</sub> oxidation                                                   | S10  |

**Table S1** Cartesian coordinates of the reactant, transition states, intermediate, and product for SO<sub>2</sub> oxidation.

| Reactant complex |             |             |             | Transition state 1 |             |             | Intermediate |   |             |             |             |
|------------------|-------------|-------------|-------------|--------------------|-------------|-------------|--------------|---|-------------|-------------|-------------|
| C                | 3.05906700  | 3.67360000  | 0.00420800  | C                  | 3.00019100  | 3.67702900  | -0.05538500  | C | 3.04572000  | 3.66460200  | -0.04862600 |
| C                | 1.64299600  | 3.71389700  | 0.08323600  | C                  | 1.57676300  | 3.69771400  | -0.00929300  | C | 1.61796800  | 3.69394400  | -0.01504800 |
| C                | 0.90424200  | 2.49732500  | 0.19420600  | C                  | 0.85391900  | 2.48059200  | 0.05676200   | C | 0.88640200  | 2.49011400  | 0.03179600  |
| C                | 1.59948500  | 1.27972400  | 0.21430800  | C                  | 1.56175300  | 1.24792200  | 0.04255500   | C | 1.58447300  | 1.23213000  | 0.01056400  |
| C                | 2.98946000  | 1.21899400  | 0.04593100  | C                  | 2.96619400  | 1.22160900  | -0.04715800  | C | 2.99373800  | 1.20839700  | -0.06312400 |
| C                | 3.73450800  | 2.43247200  | -0.04291700 | C                  | 3.69510100  | 2.44737500  | -0.08624700  | C | 3.73148400  | 2.43101500  | -0.07797000 |
| C                | -0.53061300 | 2.53892800  | 0.15915100  | C                  | -0.57263500 | 2.50700900  | 0.05810600   | C | -0.53130500 | 2.52667300  | 0.01853000  |
| C                | -0.65764900 | 0.07919600  | 0.42401800  | C                  | -0.60583800 | 0.04075500  | 0.41216800   | C | -0.58227800 | 0.05114100  | 0.41853800  |
| C                | -1.29467500 | 1.36394500  | 0.14634400  | C                  | -1.31306500 | 1.31525100  | 0.09948300   | C | -1.27788500 | 1.33041200  | 0.04954600  |
| C                | -1.36201500 | -1.15570200 | 0.08236200  | C                  | -1.34460700 | -1.20583000 | 0.06201900   | C | -1.32764000 | -1.18660800 | 0.00530000  |
| C                | -0.66724500 | -2.37278700 | 0.05949200  | C                  | -0.63841000 | -2.41570600 | -0.00668600  | C | -0.63188000 | -2.40724500 | -0.06036200 |
| C                | 0.76611900  | -2.41457000 | 0.09527500  | C                  | 0.78537900  | -2.42755500 | -0.01731900  | C | 0.78392900  | -2.42567900 | -0.04362800 |
| C                | 1.52891400  | -1.23968600 | 0.15921300  | C                  | 1.52665400  | -1.21596400 | -0.00353800  | C | 1.53410500  | -1.19789800 | -0.03074700 |
| C                | 2.92017200  | -1.25119900 | -0.00426200 | C                  | 2.93233700  | -1.22647800 | -0.08779900  | C | 2.94386900  | -1.23073400 | -0.09985000 |
| C                | 3.65789600  | -0.03471000 | -0.03336400 | C                  | 3.65514900  | -0.01210700 | -0.10095300  | C | 3.67428100  | -0.02555700 | -0.10354300 |
| C                | 0.96856100  | 4.95495000  | 0.03610500  | C                  | 0.88498500  | 4.93448300  | -0.04421100  | C | 0.93519900  | 4.93996100  | -0.04488900 |
| C                | -0.44638800 | 4.99577800  | 0.00215200  | C                  | -0.52479100 | 4.96095300  | -0.07928900  | C | -0.46870500 | 4.97841700  | -0.08531400 |
| C                | -1.19238600 | 3.79563700  | 0.01861400  | C                  | -1.25401500 | 3.75132600  | -0.06021600  | C | -1.20603400 | 3.77227500  | -0.07937400 |
| C                | -2.60268400 | 3.83547200  | -0.12766400 | C                  | -2.66545100 | 3.77019700  | -0.16928200  | C | -2.61801500 | 3.80141000  | -0.17779100 |
| C                | -3.34450100 | 2.63421200  | -0.20615500 | C                  | -3.38441500 | 2.55662700  | -0.21842000  | C | -3.34132800 | 2.59309900  | -0.22785600 |
| C                | -2.67484100 | 1.38094800  | -0.09087300 | C                  | -2.69059700 | 1.31518600  | -0.10793300  | C | -2.65109000 | 1.34634400  | -0.13834200 |
| C                | -2.74338100 | -1.08844600 | -0.13933100 | C                  | -2.72737300 | -1.16143900 | -0.12368900  | C | -2.70700100 | -1.13645800 | -0.17783900 |
| C                | -3.40813200 | 0.16710700  | -0.19941300 | C                  | -3.41076600 | 0.08563500  | -0.18036400  | C | -3.38161100 | 0.11680500  | -0.21555200 |
| C                | 5.14093500  | 2.38901800  | -0.15740400 | C                  | 5.10555300  | 2.42759700  | -0.14790800  | C | 5.14178600  | 2.40328100  | -0.12463300 |
| C                | 5.81007000  | 1.13730800  | -0.22308800 | C                  | 5.79936800  | 1.18543100  | -0.19202900  | C | 5.83069300  | 1.15500800  | -0.16184800 |
| C                | -4.74465500 | 2.67071600  | -0.38073000 | C                  | -4.78787100 | 2.57124600  | -0.35878800  | C | -4.74543500 | 2.61653800  | -0.34731900 |
| C                | -4.80978100 | 0.20954700  | -0.39104600 | C                  | -4.81386600 | 0.10651900  | -0.34273000  | C | -4.78501400 | 0.14826900  | -0.35127300 |
| C                | -5.55004300 | -0.99719200 | -0.50628500 | C                  | -5.54056800 | -1.11315500 | -0.42025800  | C | -5.52046300 | -1.06699100 | -0.41930600 |
| C                | -5.48040100 | 1.45872900  | -0.47175700 | C                  | -5.50522100 | 1.34699800  | -0.41604800  | C | -5.46940100 | 1.39462500  | -0.40107300 |
| C                | 5.06712000  | -0.07208800 | -0.17149600 | C                  | 5.07531000  | -0.03102000 | -0.17060200  | C | 5.10135100  | -0.05434700 | -0.15576700 |
| C                | 5.74055100  | -1.31876300 | -0.26852100 | C                  | 5.76474400  | -1.26589300 | -0.22709100  | C | 5.77989300  | -1.29183500 | -0.19491000 |
| C                | 3.59523200  | -2.50097800 | -0.13612600 | C                  | 3.62641200  | -2.47072000 | -0.15745000  | C | 3.63010200  | -2.48169700 | -0.14550800 |
| C                | 5.00184700  | -2.53270300 | -0.24817100 | C                  | 5.03638900  | -2.48880100 | -0.21675800  | C | 5.03976500  | -2.51125500 | -0.19013100 |
| C                | 2.85085900  | -3.70338200 | -0.13055600 | C                  | 2.89721800  | -3.68168300 | -0.15237800  | C | 2.89332200  | -3.68678100 | -0.14376000 |
| C                | -3.48330900 | -2.29831800 | -0.28371900 | C                  | -3.45554800 | -2.38303800 | -0.23793100  | C | -3.44553100 | -2.35244900 | -0.27717600 |
| C                | -4.88411800 | -2.25065000 | -0.44954800 | C                  | -4.85885500 | -2.35706600 | -0.36889900  | C | -4.84877900 | -2.31656300 | -0.38482800 |
| C                | -2.81096600 | -3.54069100 | -0.24074600 | C                  | -2.76974500 | -3.61567600 | -0.20467100  | C | -2.77142000 | -3.58900400 | -0.24196100 |
| C                | 1.43499700  | -3.66677600 | -0.05147900 | C                  | 1.47492200  | -3.66431600 | -0.10216800  | C | 1.46678700  | -3.65884300 | -0.11061600 |
| C                | 0.69098200  | -4.86528800 | -0.13150000 | C                  | 0.74897400  | -4.87934500 | -0.14565300  | C | 0.73284200  | -4.87323200 | -0.15645100 |
| C                | -0.72423700 | -4.82395100 | -0.15792900 | C                  | -0.66315300 | -4.86553300 | -0.16207900  | C | -0.67432900 | -4.85331100 | -0.18836900 |

|   |             |             |             |   |             |             |             |   |             |             |             |
|---|-------------|-------------|-------------|---|-------------|-------------|-------------|---|-------------|-------------|-------------|
| C | -1.40026500 | -3.58481600 | -0.10742300 | C | -1.35688500 | -3.63776000 | -0.12200400 | C | -1.35968400 | -3.62067100 | -0.16381700 |
| C | -1.48078600 | -6.03702100 | -0.27562000 | C | -1.40314900 | -6.09396800 | -0.23596800 | C | -1.42414000 | -6.08004300 | -0.25246800 |
| C | 1.38079400  | -6.11938100 | -0.22732200 | C | 1.45991700  | -6.12505600 | -0.20271000 | C | 1.43874900  | -6.12546800 | -0.19632300 |
| C | -1.13188300 | 6.25249000  | -0.09056600 | C | -1.23007300 | 6.21078900  | -0.15480600 | C | -1.16858300 | 6.23665600  | -0.14518100 |
| C | 1.72899000  | 6.17017500  | -0.02297800 | C | 1.63216500  | 6.16087200  | -0.07988300 | C | 1.69451600  | 6.16301400  | -0.06314300 |
| C | 7.15592200  | -1.34727800 | -0.39126800 | C | 7.18437000  | -1.27787000 | -0.29183700 | C | 7.19980100  | -1.31559400 | -0.24043300 |
| C | 7.22483100  | 1.09032700  | -0.34710100 | C | 7.21811600  | 1.15953300  | -0.25821200 | C | 7.24985200  | 1.12126800  | -0.20830800 |
| C | -6.95909500 | -0.94565800 | -0.68193900 | C | -6.95409400 | -1.08339700 | -0.55833700 | C | -6.93594100 | -1.02798200 | -0.53073200 |
| C | -6.88962300 | 1.49209500  | -0.64998700 | C | -6.91736900 | 1.35852300  | -0.55679600 | C | -6.88165800 | 1.41669500  | -0.51644000 |
| C | 3.52921800  | -4.95602100 | -0.24351300 | C | 3.59299600  | -4.92433600 | -0.21492000 | C | 3.57932600  | -4.93162900 | -0.19017300 |
| C | 5.67262200  | -3.78886300 | -0.34893700 | C | 5.72521400  | -3.73642400 | -0.27360400 | C | 5.72034400  | -3.76181700 | -0.23000600 |
| C | -3.55584400 | -4.75278300 | -0.37165200 | C | -3.49941900 | -4.84053400 | -0.29777200 | C | -3.51030000 | -4.80863400 | -0.31907100 |
| C | -5.62285700 | -3.46695900 | -0.56541600 | C | -5.58553300 | -3.58366700 | -0.44929800 | C | -5.58678900 | -3.53632200 | -0.45036100 |
| C | -5.41185700 | 3.92966500  | -0.46913800 | C | -5.47786500 | 3.81723200  | -0.43862100 | C | -5.43022400 | 3.86407600  | -0.40720800 |
| C | -3.27627000 | 5.09118900  | -0.23313900 | C | -3.35981700 | 5.01641100  | -0.26142500 | C | -3.30588800 | 5.05250100  | -0.24982300 |
| C | 3.80769600  | 4.88885000  | -0.06960800 | C | 3.73065400  | 4.90076000  | -0.09483200 | C | 3.78269500  | 4.88094400  | -0.07025900 |
| C | 5.88198600  | 3.60799400  | -0.21546500 | C | 5.82880300  | 3.65582200  | -0.17569900 | C | 5.87311600  | 3.62460900  | -0.13493700 |
| C | -7.54040700 | 2.77376200  | -0.72786700 | C | -7.59261600 | 2.62622000  | -0.63017600 | C | -7.55317200 | 2.68606600  | -0.57056800 |
| C | -7.59788900 | 0.29340400  | -0.74682400 | C | -7.60873900 | 0.14653900  | -0.62000800 | C | -7.58078100 | 0.20674900  | -0.57381300 |
| C | 7.80967600  | -2.62655700 | -0.48289300 | C | 7.85450500  | -2.55167400 | -0.34442300 | C | 7.86066000  | -2.59513100 | -0.27919500 |
| C | 7.86655400  | -0.14651500 | -0.42329700 | C | 7.88030700  | -0.06863500 | -0.30446800 | C | 7.90431000  | -0.11122100 | -0.24553600 |
| C | 5.20835700  | 4.82144000  | -0.16737900 | C | 5.13333600  | 4.85890600  | -0.14680300 | C | 5.18388800  | 4.83296300  | -0.10702900 |
| C | 3.10590300  | 6.11870600  | -0.05995800 | C | 3.00737200  | 6.12357400  | -0.09310000 | C | 3.06580700  | 6.11368700  | -0.06557900 |
| C | 1.00787400  | 7.42425400  | -0.06295200 | C | 0.89618400  | 7.40723700  | -0.11710400 | C | 0.96732500  | 7.41616700  | -0.09210700 |
| C | -0.33864800 | 7.46292400  | -0.09537300 | C | -0.45039500 | 7.43074300  | -0.15433600 | C | -0.37828600 | 7.45100100  | -0.13241600 |
| C | -2.50633000 | 6.27937800  | -0.19159300 | C | -2.60412400 | 6.21809400  | -0.23502900 | C | -2.53959100 | 6.25305800  | -0.21837100 |
| C | 7.95001300  | 2.33310400  | -0.39347700 | C | 7.92363100  | 2.41450300  | -0.27740300 | C | 7.96300300  | 2.37246600  | -0.21425200 |
| C | -2.85518300 | -5.98335000 | -0.36531100 | C | -2.77903200 | -6.06223600 | -0.29287500 | C | -2.79721100 | -6.03875800 | -0.30865500 |
| C | -0.75782800 | -7.28991500 | -0.31748400 | C | -0.65849300 | -7.33500200 | -0.25967900 | C | -0.68556200 | -7.32579700 | -0.26212700 |
| C | 0.58898800  | -7.32903300 | -0.29546400 | C | 0.68891100  | -7.34976500 | -0.24364400 | C | 0.66106900  | -7.34722600 | -0.23583900 |
| C | 2.75852400  | -6.14428600 | -0.26896100 | C | 2.83645200  | -6.12581700 | -0.22786800 | C | 2.81237100  | -6.13227400 | -0.20497300 |
| C | 4.93166000  | -4.96372700 | -0.34119300 | C | 4.99733100  | -4.91959400 | -0.26970600 | C | 4.98251800  | -4.94046700 | -0.22821300 |
| C | 7.10841500  | -3.78349500 | -0.46226900 | C | 7.16490100  | -3.71546700 | -0.33562200 | C | 7.16132600  | -3.75281500 | -0.27408300 |
| C | -4.95182000 | -4.68194100 | -0.52175800 | C | -4.89904600 | -4.79088700 | -0.40861200 | C | -4.90893100 | -4.75041800 | -0.41546500 |
| C | -7.05059700 | -3.38102900 | -0.73251700 | C | -7.01827100 | -3.51828600 | -0.57763900 | C | -7.02084100 | -3.46105600 | -0.55461300 |
| C | -7.68249700 | -2.18590700 | -0.78879900 | C | -7.66641900 | -2.33202200 | -0.63046400 | C | -7.66080700 | -2.26985600 | -0.59382900 |
| C | -6.84154800 | 3.92919700  | -0.64236600 | C | -6.91039000 | 3.79381100  | -0.57419500 | C | -6.86376500 | 3.85039600  | -0.51969400 |
| C | -4.67290900 | 5.10322600  | -0.39254600 | C | -4.75697700 | 5.00630000  | -0.38771800 | C | -4.70100800 | 5.05231600  | -0.35803700 |
| C | 7.31509800  | 3.52627700  | -0.33070100 | C | 7.26678200  | 3.59688300  | -0.23858100 | C | 7.31190800  | 3.55792100  | -0.17961400 |
| H | -1.33395300 | -8.20673300 | -0.37940200 | H | -1.21867900 | -8.26282900 | -0.29647200 | H | -1.25039200 | -8.25090000 | -0.29467700 |
| H | 1.11375300  | -8.27705500 | -0.34084300 | H | 1.23024300  | -8.28909700 | -0.26827700 | H | 1.19819600  | -8.28915100 | -0.24846700 |
| H | 3.27219400  | -7.09754600 | -0.34631900 | H | 3.36696500  | -7.07218700 | -0.27148100 | H | 3.33949700  | -7.08116600 | -0.23529900 |
| H | 5.44674000  | -5.91572800 | -0.42398000 | H | 5.52478500  | -5.86727300 | -0.31478900 | H | 5.50291100  | -5.89248000 | -0.26110500 |
| H | 7.61975300  | -4.73711300 | -0.53527700 | H | 7.68889100  | -4.66407600 | -0.37651100 | H | 7.67790400  | -4.70585000 | -0.30376000 |

|   |             |             |             |   |             |             |             |   |             |             |             |
|---|-------------|-------------|-------------|---|-------------|-------------|-------------|---|-------------|-------------|-------------|
| H | 8.89044500  | -2.64180400 | -0.57247900 | H | 8.93793900  | -2.55699900 | -0.39207800 | H | 8.94450700  | -2.60945400 | -0.31231000 |
| H | 8.94784700  | -0.17503900 | -0.51679000 | H | 8.96463300  | -0.08284400 | -0.35367900 | H | 8.98911300  | -0.13286600 | -0.27911600 |
| H | 9.03006100  | 2.29110700  | -0.48360200 | H | 9.00682400  | 2.39111600  | -0.32552500 | H | 9.04657100  | 2.34338900  | -0.24745300 |
| H | 7.87893200  | 4.45188000  | -0.36926700 | H | 7.81689300  | 4.53129100  | -0.25541400 | H | 7.86711000  | 4.48943000  | -0.18512700 |
| H | 5.77560400  | 5.74564900  | -0.21768500 | H | 5.68658800  | 5.79247900  | -0.17200700 | H | 5.74294600  | 5.76329900  | -0.11910900 |
| H | 3.67245800  | 7.04350700  | -0.10726200 | H | 3.56429200  | 7.05525500  | -0.11987000 | H | 3.63186200  | 7.04019700  | -0.07857700 |
| H | 1.58592700  | 8.34173900  | -0.07985800 | H | 1.46391800  | 8.33117300  | -0.12436600 | H | 1.54256100  | 8.33548000  | -0.08848100 |
| H | -0.86175200 | 8.41196500  | -0.13928200 | H | -0.98401800 | 8.37406600  | -0.19165000 | H | -0.90441300 | 8.39877300  | -0.16106100 |
| H | -3.01676500 | 7.23466900  | -0.26553300 | H | -3.13041000 | 7.16550900  | -0.29537400 | H | -3.06181100 | 7.20341200  | -0.26487500 |
| H | -5.18447100 | 6.05774100  | -0.46820000 | H | -5.28729200 | 5.95094900  | -0.45431100 | H | -5.22843500 | 5.99940900  | -0.40905200 |
| H | -7.35014100 | 4.88494400  | -0.70610900 | H | -7.43559900 | 4.74076200  | -0.63147700 | H | -7.38497300 | 4.80022000  | -0.56177500 |
| H | -8.61665500 | 2.79211100  | -0.86074300 | H | -8.67222000 | 2.62527700  | -0.73294800 | H | -8.63439100 | 2.69047600  | -0.65374600 |
| H | -8.67477400 | 0.32540600  | -0.88109500 | H | -8.68960300 | 0.16258700  | -0.72395100 | H | -8.66355800 | 0.23091000  | -0.65708400 |
| H | -8.75837800 | -2.14027600 | -0.91818800 | H | -8.74594700 | -2.29974700 | -0.72901700 | H | -8.74164000 | -2.22819500 | -0.67184900 |
| H | -7.61233200 | -4.30502700 | -0.81537900 | H | -7.57041300 | -4.44993100 | -0.63280400 | H | -7.58072100 | -4.38849400 | -0.59994700 |
| H | -5.51653600 | -5.60430600 | -0.61576600 | H | -5.45530500 | -5.72061300 | -0.47387700 | H | -5.47365700 | -5.67566800 | -0.46827700 |
| H | -3.41920700 | -6.90644600 | -0.45639300 | H | -3.33221900 | -6.99428000 | -0.35177200 | H | -3.35846500 | -6.96647400 | -0.35679700 |
| C | 0.87995500  | 0.03268100  | 0.46429100  | C | 0.85570800  | 0.02339900  | 0.12164800  | C | 0.87357000  | 0.02982400  | 0.04890200  |
| O | 0.07954800  | 0.03027500  | 1.64407500  | O | -0.10762800 | 0.00784900  | 1.76724500  | O | -0.43774200 | 0.04436000  | 1.85006200  |
| S | -1.75750700 | -1.00075100 | 3.41336000  | S | -1.54285800 | -0.48357600 | 3.14732100  | S | -1.81061300 | -0.60631600 | 3.00719500  |
| O | -1.94190800 | -2.33518400 | 2.89897100  | O | -2.56388900 | 0.45727700  | 2.69460600  | O | -2.96617600 | 0.19537400  | 2.57976300  |
| O | -2.54442200 | 0.05503700  | 2.82558600  | O | -1.77615500 | -1.87045900 | 2.75796100  | O | -1.89161200 | -2.00926600 | 2.56625100  |

| Transition state 2 |             |             |             | Product complex |             |             |             |
|--------------------|-------------|-------------|-------------|-----------------|-------------|-------------|-------------|
| C                  | 3.00670300  | 3.67693200  | -0.07277500 | C               | 3.04942100  | 3.69381400  | -0.10797300 |
| C                  | 1.58144100  | 3.69624100  | -0.03783900 | C               | 1.62967700  | 3.73649200  | -0.12985200 |
| C                  | 0.85758500  | 2.48354600  | 0.00064100  | C               | 0.88482500  | 2.52709300  | -0.17250500 |
| C                  | 1.56191600  | 1.23497100  | -0.02161200 | C               | 1.56367000  | 1.27439300  | -0.17904000 |
| C                  | 2.97121400  | 1.21878300  | -0.09152700 | C               | 2.97349800  | 1.23337100  | -0.15700900 |
| C                  | 3.70034700  | 2.44654400  | -0.10032000 | C               | 3.72233400  | 2.44922000  | -0.11469800 |
| C                  | -0.55665400 | 2.50616500  | -0.00795000 | C               | -0.52071500 | 2.56734200  | -0.19147700 |
| C                  | -0.58838200 | 0.03858600  | 0.27843100  | C               | -0.59521900 | 0.11245700  | -0.23898300 |
| C                  | -1.29471800 | 1.30057900  | 0.02153800  | C               | -1.26888000 | 1.35567400  | -0.23649100 |
| C                  | -1.32716500 | -1.20144300 | 0.00244900  | C               | -1.33770600 | -1.09521300 | -0.29151000 |
| C                  | -0.62074800 | -2.42236400 | -0.06173600 | C               | -0.65805600 | -2.35152400 | -0.27941900 |
| C                  | 0.79098400  | -2.43379400 | -0.05413100 | C               | 0.74716600  | -2.38862200 | -0.26296200 |
| C                  | 1.52887800  | -1.20427700 | -0.05125900 | C               | 1.49459900  | -1.17550900 | -0.22325700 |
| C                  | 2.93915400  | -1.22479100 | -0.11872000 | C               | 2.90375500  | -1.21480800 | -0.19869000 |
| C                  | 3.65998400  | -0.01250200 | -0.12273900 | C               | 3.64335500  | -0.01067800 | -0.15782400 |
| C                  | 0.88956600  | 4.93386400  | -0.06124000 | C               | 0.95643000  | 4.97785500  | -0.11941600 |
| C                  | -0.51712900 | 4.95800300  | -0.09544300 | C               | -0.45471900 | 5.01801000  | -0.13928200 |
| C                  | -1.24436000 | 3.74609900  | -0.09200700 | C               | -1.19643000 | 3.81659600  | -0.17836400 |
| C                  | -2.65847900 | 3.76262200  | -0.18370400 | C               | -2.61611500 | 3.85385400  | -0.19417000 |
| C                  | -3.37580700 | 2.54819000  | -0.23507400 | C               | -3.35820900 | 2.64929300  | -0.23132200 |
| C                  | -2.67883100 | 1.30468400  | -0.15036900 | C               | -2.67919800 | 1.39342000  | -0.24828900 |

|   |             |             |             |   |             |             |             |
|---|-------------|-------------|-------------|---|-------------|-------------|-------------|
| C | -2.71866100 | -1.16181000 | -0.16799900 | C | -2.75173500 | -1.05458300 | -0.28960300 |
| C | -3.39943600 | 0.07826800  | -0.23164500 | C | -3.41994100 | 0.19004100  | -0.28641000 |
| C | 5.11036900  | 2.42771500  | -0.14761200 | C | 5.13155800  | 2.40719000  | -0.09082700 |
| C | 5.80715900  | 1.18434800  | -0.18086700 | C | 5.80798900  | 1.15342200  | -0.09634600 |
| C | -4.78081600 | 2.56282300  | -0.35182800 | C | -4.76780700 | 2.68683800  | -0.24225400 |
| C | -4.81013900 | 0.09901500  | -0.35502600 | C | -4.84415600 | 0.22962300  | -0.29110700 |
| C | -5.53487400 | -1.11880700 | -0.42050100 | C | -5.58382100 | -0.97522700 | -0.32043400 |
| C | -5.50124600 | 1.33738600  | -0.40950900 | C | -5.51478400 | 1.47404700  | -0.27470800 |
| C | 5.08638600  | -0.03095400 | -0.17520900 | C | 5.06790300  | -0.05123500 | -0.13400400 |
| C | 5.77423000  | -1.26424900 | -0.20635000 | C | 5.73861300  | -1.29611500 | -0.13652200 |
| C | 3.63494300  | -2.47094200 | -0.15195000 | C | 3.58283900  | -2.47154500 | -0.19773700 |
| C | 5.04432700  | -2.48901400 | -0.19803900 | C | 4.99208900  | -2.50957400 | -0.17177800 |
| C | 2.90817900  | -3.68345400 | -0.14526600 | C | 2.84128700  | -3.67619400 | -0.23198800 |
| C | -3.44516600 | -2.38607700 | -0.26162600 | C | -3.49856500 | -2.27133900 | -0.32709700 |
| C | -4.84908600 | -2.36248700 | -0.37278100 | C | -4.90739400 | -2.22874800 | -0.33410600 |
| C | -2.75809900 | -3.61853900 | -0.22013900 | C | -2.82475100 | -3.51526100 | -0.33141100 |
| C | 1.48409600  | -3.66631500 | -0.11001400 | C | 1.42166600  | -3.63832600 | -0.25812900 |
| C | 0.75971800  | -4.88306200 | -0.14342000 | C | 0.67905000  | -4.83947000 | -0.28870600 |
| C | -0.65002400 | -4.86969200 | -0.16827600 | C | -0.73189700 | -4.79994500 | -0.31229200 |
| C | -1.34341100 | -3.64132000 | -0.14722600 | C | -1.40489700 | -3.55898900 | -0.31579400 |
| C | -1.39206200 | -6.10067100 | -0.22252400 | C | -1.49578700 | -6.01854300 | -0.33776000 |
| C | 1.47315800  | -6.13082900 | -0.17788300 | C | 1.37221900  | -6.09991800 | -0.28796300 |
| C | -1.22738900 | 6.20962800  | -0.14786500 | C | -1.14818800 | 6.27803100  | -0.12367600 |
| C | 1.63804100  | 6.16312800  | -0.07745900 | C | 1.71999800  | 6.19646500  | -0.08139000 |
| C | 7.19442300  | -1.27725900 | -0.25145500 | C | 7.15850300  | -1.33039200 | -0.10834300 |
| C | 7.22657100  | 1.16042400  | -0.22658000 | C | 7.22760200  | 1.10661300  | -0.06892800 |
| C | -6.95099100 | -1.09142900 | -0.53128900 | C | -7.00367300 | -0.92883600 | -0.32957700 |
| C | -6.91497100 | 1.34984900  | -0.52248200 | C | -6.93486900 | 1.50820200  | -0.28519300 |
| C | 3.60382600  | -4.92422000 | -0.18389100 | C | 3.51914100  | -4.92875300 | -0.23314000 |
| C | 5.73490200  | -3.73523800 | -0.23048600 | C | 5.66523500  | -3.76659400 | -0.17484800 |
| C | -3.48709000 | -4.84310700 | -0.29071000 | C | -3.57229300 | -4.72697300 | -0.35335600 |
| C | -5.57535300 | -3.58932900 | -0.43444300 | C | -5.65047300 | -3.44549200 | -0.35814900 |
| C | -5.47268200 | 3.80689300  | -0.40932300 | C | -5.44107900 | 3.94356100  | -0.22242600 |
| C | -3.35465900 | 5.00746900  | -0.24999600 | C | -3.29427600 | 5.10616600  | -0.17563300 |
| C | 3.73514900  | 4.89935300  | -0.09170700 | C | 3.79723400  | 4.90579900  | -0.07035100 |
| C | 5.83348900  | 3.65471800  | -0.15692500 | C | 5.87468600  | 3.62392600  | -0.05399700 |
| C | -7.59101800 | 2.61796600  | -0.57566200 | C | -7.58879900 | 2.79121500  | -0.26509600 |
| C | -7.60781000 | 0.13716500  | -0.57876200 | C | -7.64789300 | 0.30882700  | -0.31251300 |
| C | 7.86565400  | -2.55145300 | -0.28471500 | C | 7.81232700  | -2.61362300 | -0.11405100 |
| C | 7.88948000  | -0.06765100 | -0.26011800 | C | 7.87164300  | -0.13113500 | -0.07559900 |
| C | 5.13720700  | 4.85859400  | -0.12879900 | C | 5.19996900  | 4.83891100  | -0.04528800 |
| C | 3.01042500  | 6.12625700  | -0.08345900 | C | 3.09292200  | 6.14187900  | -0.05916600 |
| C | 0.89821000  | 7.40912100  | -0.09970600 | C | 0.99379700  | 7.45064100  | -0.06793000 |
| C | -0.44788500 | 7.43100700  | -0.13430500 | C | -0.35250600 | 7.48897100  | -0.08766000 |

|   |             |             |             |   |             |             |             |
|---|-------------|-------------|-------------|---|-------------|-------------|-------------|
| C | -2.59888500 | 6.21374800  | -0.21667600 | C | -2.52206000 | 6.30096300  | -0.14130000 |
| C | 7.93151700  | 2.41609400  | -0.23430500 | C | 7.95297000  | 2.35044900  | -0.03373500 |
| C | -2.76555600 | -6.06780400 | -0.27521800 | C | -2.86844800 | -5.96347300 | -0.35738500 |
| C | -0.64593200 | -7.34218400 | -0.22876000 | C | -0.76983900 | -7.27284700 | -0.33879400 |
| C | 0.70088700  | -7.35643600 | -0.20755700 | C | 0.57636900  | -7.31100300 | -0.31531200 |
| C | 2.84733500  | -6.13018500 | -0.19030400 | C | 2.74588800  | -6.12312500 | -0.26196300 |
| C | 5.00774800  | -4.91977300 | -0.22244500 | C | 4.92324700  | -4.94165500 | -0.20517300 |
| C | 7.17574500  | -3.71471600 | -0.27453800 | C | 7.10614400  | -3.76686600 | -0.14520300 |
| C | -4.88691500 | -4.79597000 | -0.38945400 | C | -4.97517500 | -4.65989800 | -0.36754800 |
| C | -7.01025800 | -3.52676100 | -0.54390400 | C | -7.08900600 | -3.36451800 | -0.36939300 |
| C | -7.66169700 | -2.34221600 | -0.59035000 | C | -7.72911600 | -2.17282800 | -0.35574000 |
| C | -6.90702600 | 3.78481200  | -0.52260300 | C | -6.88221700 | 3.94423400  | -0.23554000 |
| C | -4.75128300 | 4.99759300  | -0.35648500 | C | -4.69867100 | 5.11824900  | -0.19063000 |
| C | 7.27266000  | 3.59729200  | -0.20124600 | C | 7.31310700  | 3.54233600  | -0.02649800 |
| H | -1.20585200 | -8.27051200 | -0.25499900 | H | -1.34584100 | -8.19162100 | -0.35739100 |
| H | 1.24231700  | -8.29596000 | -0.21758800 | H | 1.10002400  | -8.26071700 | -0.31580500 |
| H | 3.38062100  | -7.07554500 | -0.21640900 | H | 3.26448300  | -7.07681800 | -0.26267800 |
| H | 5.53680300  | -5.86717200 | -0.25016300 | H | 5.44156600  | -5.89542200 | -0.20699100 |
| H | 7.69996200  | -4.66369100 | -0.29992300 | H | 7.61745700  | -4.72322100 | -0.14859300 |
| H | 8.94958900  | -2.55705300 | -0.31763900 | H | 8.89639200  | -2.63450400 | -0.09201400 |
| H | 8.97447500  | -0.08151700 | -0.29304200 | H | 8.95664400  | -0.16198900 | -0.05384600 |
| H | 9.01525300  | 2.39385900  | -0.26719500 | H | 9.03651200  | 2.30984800  | -0.01244800 |
| H | 7.82181500  | 4.53236900  | -0.20784100 | H | 7.87706600  | 4.46828400  | 0.00037500  |
| H | 5.69117800  | 5.79198600  | -0.14030800 | H | 5.77042300  | 5.76212100  | -0.01780800 |
| H | 3.56890200  | 7.05718800  | -0.09543200 | H | 3.66382900  | 7.06483800  | -0.03158900 |
| H | 1.46424000  | 8.33412600  | -0.09552000 | H | 1.56970000  | 8.36930400  | -0.04121100 |
| H | -0.98297600 | 8.37393900  | -0.15770200 | H | -0.87619300 | 8.43860400  | -0.07605600 |
| H | -3.12955400 | 7.15971900  | -0.25856400 | H | -3.04132000 | 7.25416400  | -0.12717400 |
| H | -5.28428000 | 5.94191200  | -0.40386200 | H | -5.21718700 | 6.07183800  | -0.17484700 |
| H | -7.43279900 | 4.73227300  | -0.56345900 | H | -7.39325700 | 4.90060300  | -0.21950500 |
| H | -8.67222600 | 2.61840500  | -0.65946400 | H | -8.67302300 | 2.81205900  | -0.27357700 |
| H | -8.69035900 | 0.15320000  | -0.66257600 | H | -8.73306900 | 0.33929300  | -0.32004000 |
| H | -8.74270900 | -2.31262800 | -0.67175200 | H | -8.81281100 | -2.13249600 | -0.36355500 |
| H | -7.56142400 | -4.45958400 | -0.58721100 | H | -7.65296500 | -4.29064900 | -0.38754900 |
| H | -5.44337000 | -5.72657300 | -0.43853400 | H | -5.54567100 | -5.58336800 | -0.38294300 |
| H | -3.32103300 | -6.99933700 | -0.31860100 | H | -3.44003400 | -6.88623500 | -0.37332900 |
| C | 0.85822800  | 0.02339100  | 0.01008700  | C | 0.82386300  | 0.06983900  | -0.22286300 |
| O | -0.38806200 | 0.04224600  | 1.94063000  | O | 0.02018000  | -1.18237400 | 2.66856300  |
| S | -1.55735400 | -0.43388500 | 2.97074100  | S | -1.40833300 | -1.11726700 | 2.61233200  |
| O | -2.68115600 | 0.50000400  | 2.85350900  | O | -2.06804400 | 0.15199200  | 2.65852700  |
| O | -1.84775000 | -1.83946000 | 2.64783200  | O | -2.17772900 | -2.32378100 | 2.61023900  |

**Table S2** Cartesian coordinates of the reactant, transition state, and product for H<sub>2</sub>SO<sub>3</sub> oxidation.

| Reactant complex |             |             | Transition state |   |             | Product complex |             |   |             |             |             |
|------------------|-------------|-------------|------------------|---|-------------|-----------------|-------------|---|-------------|-------------|-------------|
| C                | 2.68793900  | 3.77705100  | -0.19549400      | C | 2.78175700  | 3.75199000      | -0.27611600 | C | 2.77507900  | 3.68560900  | -0.34124700 |
| C                | 1.26836100  | 3.76006800  | -0.11642600      | C | 1.35812600  | 3.74727200      | -0.23841400 | C | 1.35371300  | 3.68763600  | -0.33405600 |
| C                | 0.57125000  | 2.52415900  | 0.02242400       | C | 0.65286400  | 2.51820500      | -0.21127300 | C | 0.64120500  | 2.45934400  | -0.35051200 |
| C                | 1.31804700  | 1.27836800  | 0.01314700       | C | 1.38067800  | 1.28220700      | -0.25563300 | C | 1.35380000  | 1.22460300  | -0.35856100 |
| C                | 2.72266100  | 1.31146400  | -0.15725100      | C | 2.79245600  | 1.29219500      | -0.29776100 | C | 2.76788900  | 1.22286300  | -0.36797900 |
| C                | 3.41626300  | 2.56199500  | -0.21299800      | C | 3.49817800  | 2.53287900      | -0.30966400 | C | 3.48382700  | 2.46122800  | -0.34520100 |
| C                | -0.81623000 | 2.53168100  | 0.06749200       | C | -0.75608600 | 2.51601800      | -0.17807400 | C | -0.76378000 | 2.45770500  | -0.33006800 |
| C                | -0.76985600 | -0.01666200 | 0.35460300       | C | -0.74159400 | 0.04500600      | 0.02143300  | C | -0.77312200 | -0.00107700 | -0.34630700 |
| C                | -1.54686500 | 1.29000700  | 0.34635300       | C | -1.46750500 | 1.28854900      | -0.13866800 | C | -1.47723000 | 1.22466900  | -0.33443500 |
| C                | -1.49958300 | -1.25482500 | 0.07378200       | C | -1.46070000 | -1.19707500     | -0.21617100 | C | -1.47808700 | -1.22597800 | -0.33306600 |
| C                | -0.75516700 | -2.44816500 | -0.09659600      | C | -0.73818800 | -2.40895100     | -0.28896600 | C | -0.76469200 | -2.45889200 | -0.32822900 |
| C                | 0.65392500  | -2.41619000 | -0.17055100      | C | 0.67323300  | -2.39767800     | -0.30173000 | C | 0.64049500  | -2.46105300 | -0.35195600 |
| C                | 1.35728600  | -1.16287100 | -0.13557900      | C | 1.39070300  | -1.15791300     | -0.29499500 | C | 1.35459300  | -1.22861800 | -0.36223300 |
| C                | 2.75948100  | -1.13641400 | -0.28482100      | C | 2.80037700  | -1.15240200     | -0.32770500 | C | 2.76581400  | -1.22855600 | -0.37120400 |
| C                | 3.44483000  | 0.10092600  | -0.25905700      | C | 3.50045200  | 0.07277400      | -0.33127200 | C | 3.47355700  | -0.00471400 | -0.35885400 |
| C                | 0.54313300  | 4.96809100  | -0.18992700      | C | 0.64379200  | 4.96898100      | -0.22358400 | C | 0.64701900  | 4.91010800  | -0.32063000 |
| C                | -0.86982300 | 4.95021400  | -0.19707200      | C | -0.76672200 | 4.96672000      | -0.20707700 | C | -0.76451100 | 4.90969900  | -0.30635300 |
| C                | -1.55592000 | 3.72297400  | -0.08892900      | C | -1.47087400 | 3.74300200      | -0.18965000 | C | -1.47289600 | 3.68790200  | -0.31213200 |
| C                | -2.98431100 | 3.68957900  | -0.14597300      | C | -2.89023700 | 3.73622200      | -0.19069300 | C | -2.89314600 | 3.68647600  | -0.28686400 |
| C                | -3.68318900 | 2.44867900  | -0.10781000      | C | -3.59055500 | 2.50799500      | -0.19908400 | C | -3.60093300 | 2.46164800  | -0.28328300 |
| C                | -2.98170500 | 1.22920000  | 0.06027300       | C | -2.87155700 | 1.27501800      | -0.18366100 | C | -2.88674800 | 1.22461300  | -0.29759200 |
| C                | -2.88107400 | -1.24381200 | 0.02715000       | C | -2.85546700 | -1.19018900     | -0.24973600 | C | -2.88779000 | -1.22439300 | -0.29549400 |
| C                | -3.62607000 | 0.00296800  | 0.01861900       | C | -3.56690300 | 0.04325000      | -0.21711200 | C | -3.59261700 | 0.00036400  | -0.28945700 |
| C                | 4.81884300  | 2.58246600  | -0.33356200      | C | 4.90769000  | 2.53844400      | -0.33887500 | C | 4.89373200  | 2.45698600  | -0.34856100 |
| C                | 5.55199700  | 1.35936400  | -0.40223600      | C | 5.62603600  | 1.30698500      | -0.36593800 | C | 5.60500000  | 1.22177700  | -0.35104100 |
| C                | -5.08600500 | 2.42298400  | -0.23420000      | C | -4.99957300 | 2.49918400      | -0.22280100 | C | -5.01068700 | 2.46043100  | -0.25252900 |
| C                | -5.04654000 | -0.03082000 | -0.13873900      | C | -4.98733900 | 0.03663000      | -0.25490400 | C | -5.01768400 | 0.00099900  | -0.25335000 |
| C                | -5.72990900 | -1.27108700 | -0.20129600      | C | -5.69041100 | -1.19421800     | -0.30280700 | C | -5.72412700 | -1.22392200 | -0.23952500 |
| C                | -5.77002400 | 1.17860700  | -0.23143300      | C | -5.70069400 | 1.26127700      | -0.24658000 | C | -5.72310500 | 1.22654000  | -0.24177100 |
| C                | 4.86964200  | 0.12505500  | -0.38567900      | C | 4.92718000  | 0.07952700      | -0.35583800 | C | 4.89954300  | -0.00385600 | -0.36022600 |
| C                | 5.58922000  | -1.08725400 | -0.48326300      | C | 5.63628400  | -1.14208300     | -0.38391600 | C | 5.60393100  | -1.22969700 | -0.35552300 |
| C                | 3.49014900  | -2.36233700 | -0.38609100      | C | 3.51731600  | -2.38593100     | -0.35646300 | C | 3.48061800  | -2.46523200 | -0.35413000 |
| C                | 4.89629900  | -2.33408500 | -0.48815800      | C | 4.92740700  | -2.37925100     | -0.37814800 | C | 4.89067600  | -2.46323200 | -0.35578700 |
| C                | 2.79964800  | -3.59357200 | -0.39927700      | C | 2.81047000  | -3.60946600     | -0.35355800 | C | 2.77182300  | -3.68948700 | -0.34735500 |
| C                | -3.58556600 | -2.48442600 | -0.11288400      | C | -3.56871900 | -2.42636100     | -0.31502100 | C | -3.60295400 | -2.46075500 | -0.27969900 |
| C                | -4.99608800 | -2.49925300 | -0.18658800      | C | -4.97814800 | -2.42732600     | -0.33259800 | C | -5.01272900 | -2.45835900 | -0.24814700 |
| C                | -2.86322100 | -3.69561200 | -0.18411700      | C | -2.85858200 | -3.64672700     | -0.34466500 | C | -2.89573000 | -3.68598400 | -0.28187200 |
| C                | 1.37557500  | -3.61855300 | -0.30280200      | C | 1.38571200  | -3.61610800     | -0.33723800 | C | 1.35106800  | -3.69032300 | -0.33763900 |
| C                | 0.68720800  | -4.85877700 | -0.35463700      | C | 0.68265100  | -4.84618300     | -0.35874000 | C | 0.64333300  | -4.91230300 | -0.32178700 |
| C                | -0.71528100 | -4.88894000 | -0.30477100      | C | -0.72546200 | -4.85902200     | -0.36433000 | C | -0.76817300 | -4.91098900 | -0.30404000 |
| C                | -1.44452700 | -3.68077400 | -0.19714700      | C | -1.44075000 | -3.64163900     | -0.33572200 | C | -1.47533600 | -3.68840600 | -0.30923500 |
| C                | -1.42826300 | -6.14121400 | -0.37489800      | C | -1.44814600 | -6.10381300     | -0.39758200 | C | -1.49744100 | -6.15077100 | -0.28411600 |
| C                | 1.43920000  | -6.08424500 | -0.46629100      | C | 1.41914500  | -6.08210500     | -0.38645400 | C | 1.37175900  | -6.15276700 | -0.31523500 |

|   |             |             |             |   |             |             |             |   |             |             |             |
|---|-------------|-------------|-------------|---|-------------|-------------|-------------|---|-------------|-------------|-------------|
| C | -1.61901500 | 6.17276900  | -0.30551100 | C | -1.49993000 | 6.20491300  | -0.20400000 | C | -1.49265200 | 6.15009300  | -0.28821500 |
| C | 1.24989000  | 6.21868700  | -0.28863500 | C | 1.36828800  | 6.21163500  | -0.24045600 | C | 1.37682900  | 6.14979300  | -0.31246800 |
| C | 7.00449900  | -1.05769700 | -0.59145000 | C | 7.05633600  | -1.13053300 | -0.41065200 | C | 7.02463700  | -1.22377400 | -0.35408200 |
| C | 6.96829000  | 1.37857500  | -0.51861700 | C | 7.04641000  | 1.30770600  | -0.39493800 | C | 7.02550700  | 1.21490000  | -0.34991100 |
| C | -7.13915800 | -1.28962700 | -0.31409100 | C | -7.10888600 | -1.19238600 | -0.32736500 | C | -7.14450700 | -1.21706400 | -0.20874900 |
| C | -7.19347800 | 1.14679800  | -0.35288100 | C | -7.12157000 | 1.24824400  | -0.27423300 | C | -7.14345700 | 1.22091500  | -0.21112600 |
| C | 3.52784100  | -4.81055900 | -0.50884400 | C | 3.52786300  | -4.83802600 | -0.38142900 | C | 3.48485100  | -4.92269800 | -0.33813300 |
| C | 5.61996900  | -3.55530400 | -0.58870500 | C | 5.63925700  | -3.61277600 | -0.40207500 | C | 5.59875000  | -3.70088800 | -0.34889800 |
| C | -3.55976600 | -4.94053200 | -0.28062600 | C | -3.56826200 | -4.88407700 | -0.38596200 | C | -3.60957800 | -4.91840400 | -0.26162500 |
| C | -5.68252900 | -3.73830400 | -0.27973400 | C | -5.68282700 | -3.66478100 | -0.37769800 | C | -5.72182100 | -3.69545000 | -0.22926300 |
| C | -5.80962400 | 3.65196400  | -0.35319500 | C | -5.71526500 | 3.73388400  | -0.22325100 | C | -5.71882000 | 3.69807900  | -0.23562700 |
| C | -3.70737300 | 4.89676900  | -0.28277900 | C | -3.60863400 | 4.96574100  | -0.19688100 | C | -3.60586100 | 4.91945200  | -0.26814800 |
| C | 3.37779000  | 5.01737900  | -0.28838300 | C | 3.48819300  | 4.98719000  | -0.28956200 | C | 3.48932100  | 4.91819300  | -0.32993000 |
| C | 5.50683400  | 3.83100600  | -0.39362300 | C | 5.60907000  | 3.77914300  | -0.34743400 | C | 5.60252100  | 3.69416900  | -0.33910500 |
| C | -7.90089200 | 2.40211300  | -0.45477600 | C | -7.82060000 | 2.50750700  | -0.26748100 | C | -7.83292200 | 2.48522800  | -0.19560500 |
| C | -7.84419600 | -0.07487100 | -0.37813100 | C | -7.79194200 | 0.02668900  | -0.30949300 | C | -7.82297300 | 0.00219200  | -0.19629500 |
| C | 7.71119500  | -2.30839500 | -0.68829000 | C | 7.74984000  | -2.39265100 | -0.43214300 | C | 7.71395800  | -2.48827400 | -0.35217800 |
| C | 7.66346400  | 0.17343300  | -0.60356000 | C | 7.73062000  | 0.09186600  | -0.41608400 | C | 7.70363000  | -0.00482900 | -0.35225300 |
| C | 4.78083900  | 5.01341500  | -0.36912600 | C | 4.89228700  | 4.96998600  | -0.32391000 | C | 4.89360700  | 4.88967600  | -0.33091700 |
| C | 2.62174000  | 6.22312500  | -0.31907600 | C | 2.74179800  | 6.19964400  | -0.26841600 | C | 2.75084000  | 6.13438800  | -0.31830500 |
| C | 0.46831400  | 7.43751400  | -0.36584500 | C | 0.60459000  | 7.44331600  | -0.22860500 | C | 0.61593800  | 7.38331500  | -0.29730800 |
| C | -0.87809900 | 7.41661800  | -0.37815700 | C | -0.74221600 | 7.44022100  | -0.21220400 | C | -0.73095700 | 7.38310500  | -0.28605000 |
| C | -2.99147700 | 6.12691900  | -0.34224900 | C | -2.87406800 | 6.18460900  | -0.19751000 | C | -2.86649400 | 6.13511700  | -0.27113700 |
| C | 7.63658300  | 2.65511700  | -0.55288000 | C | 7.72903300  | 2.57635100  | -0.40167400 | C | 7.71583200  | 2.47887000  | -0.34426000 |
| C | -2.79820600 | -6.14676500 | -0.35827300 | C | -2.82177600 | -6.09661500 | -0.40906700 | C | -2.87129700 | -6.13469600 | -0.26465500 |
| C | -0.64573200 | -7.35855900 | -0.46761900 | C | -0.67892800 | -7.33187600 | -0.41770800 | C | -0.73697100 | -7.38455800 | -0.28328800 |
| C | 0.69946500  | -7.33116500 | -0.50967500 | C | 0.66780100  | -7.32131100 | -0.41090200 | C | 0.60992300  | -7.38569300 | -0.29786000 |
| C | 2.80709000  | -6.04295600 | -0.53298500 | C | 2.79203400  | -6.05796000 | -0.39277400 | C | 2.74581100  | -6.13848000 | -0.32457600 |
| C | 4.92597900  | -4.76196300 | -0.59725500 | C | 4.93113900  | -4.80980000 | -0.40205400 | C | 4.88920600  | -4.89591200 | -0.34132200 |
| C | 7.05580400  | -3.49198200 | -0.68612200 | C | 7.07950400  | -3.56784600 | -0.42755400 | C | 7.03946500  | -3.66078600 | -0.34920900 |
| C | -4.95351400 | -4.93228400 | -0.31128900 | C | -4.96986200 | -4.86110300 | -0.40179400 | C | -5.01360700 | -4.89128700 | -0.23654700 |
| C | -7.11699100 | -3.72251500 | -0.35885200 | C | -7.12194000 | -3.62744200 | -0.39584900 | C | -7.16211000 | -3.65427400 | -0.20047900 |
| C | -7.80911500 | -2.55783700 | -0.37639700 | C | -7.79752100 | -2.45482400 | -0.37267400 | C | -7.83496500 | -2.48082700 | -0.19082000 |
| C | -7.24946900 | 3.58447800  | -0.45731700 | C | -7.15553600 | 3.68485100  | -0.24374000 | C | -7.15912100 | 3.65809800  | -0.20717000 |
| C | -5.11855800 | 4.84864100  | -0.37105700 | C | -5.01343200 | 4.93302100  | -0.20867400 | C | -5.00984000 | 4.89347200  | -0.24410500 |
| C | 6.94560000  | 3.81509000  | -0.49651300 | C | 7.04996200  | 3.74597800  | -0.37970000 | C | 7.04308900  | 3.65241700  | -0.33883900 |
| H | -1.17906100 | -8.30211100 | -0.50594500 | H | -1.22217900 | -8.27023500 | -0.43752000 | H | -1.28771300 | -8.31880100 | -0.26959700 |
| H | 1.26624700  | -8.25308900 | -0.58123700 | H | 1.22571800  | -8.25118300 | -0.42552600 | H | 1.15953000  | -8.32065900 | -0.29615200 |
| H | 3.36725100  | -6.96921000 | -0.61445200 | H | 3.34192700  | -6.99392700 | -0.41223600 | H | 3.29062600  | -7.07738400 | -0.31986000 |
| H | 5.48074500  | -5.69156500 | -0.67812600 | H | 5.47648700  | -5.74821900 | -0.42091100 | H | 5.43364200  | -5.83505300 | -0.33635600 |
| H | 7.60473900  | -4.42430100 | -0.76041700 | H | 7.62026200  | -4.50774000 | -0.44342900 | H | 7.57688800  | -4.60273300 | -0.34672900 |
| H | 8.79264500  | -2.28015100 | -0.76440500 | H | 8.83402100  | -2.38002100 | -0.45155700 | H | 8.79836200  | -2.47916600 | -0.35181300 |
| H | 8.74570000  | 0.19213200  | -0.68781100 | H | 8.81598000  | 0.09642400  | -0.43678900 | H | 8.78925400  | -0.00516900 | -0.35059000 |
| H | 8.71807300  | 2.66322500  | -0.63296800 | H | 8.81324800  | 2.57274200  | -0.42438100 | H | 8.80023100  | 2.46856000  | -0.34349600 |



|   |             |             |             |   |             |             |             |   |             |             |             |
|---|-------------|-------------|-------------|---|-------------|-------------|-------------|---|-------------|-------------|-------------|
| H | 7.46507700  | 4.76631800  | -0.53234200 | H | 7.58326200  | 4.69017700  | -0.38468100 | H | 7.58172900  | 4.59361700  | -0.33391400 |
| H | 5.30716200  | 5.96091400  | -0.42867100 | H | 5.43022700  | 5.91274400  | -0.33146200 | H | 5.43882800  | 5.82831300  | -0.32408600 |
| H | 3.15286700  | 7.16717500  | -0.39075200 | H | 3.28296400  | 7.14077600  | -0.27839400 | H | 3.29629700  | 7.07285500  | -0.31199900 |
| H | 1.00426300  | 8.37859800  | -0.42357100 | H | 1.15290200  | 8.37890600  | -0.23531800 | H | 1.16624400  | 8.31782000  | -0.29396900 |
| H | -1.44220500 | 8.34050100  | -0.44425500 | H | -1.29452300 | 8.37344100  | -0.20539600 | H | -1.28089600 | 8.31781400  | -0.27335500 |
| H | -3.55389200 | 7.05110500  | -0.43144200 | H | -3.42236000 | 7.12138000  | -0.19739400 | H | -3.41115900 | 7.07407200  | -0.25599700 |
| H | -5.66785200 | 5.77985100  | -0.46774300 | H | -5.56259300 | 5.86916200  | -0.21109600 | H | -5.55402700 | 5.83263800  | -0.22898700 |
| H | -7.79879000 | 4.51587600  | -0.53954500 | H | -7.69944700 | 4.62291600  | -0.24045100 | H | -7.69655000 | 4.59996100  | -0.19390000 |
| H | -8.98194900 | 2.37096400  | -0.53628600 | H | -8.90475700 | 2.48986100  | -0.28374600 | H | -8.91714700 | 2.47569700  | -0.17362400 |
| H | -8.92600100 | -0.09963500 | -0.46658900 | H | -8.87760200 | 0.02168600  | -0.32793500 | H | -8.90837600 | 0.00269000  | -0.17353800 |
| H | -8.89123500 | -2.56329900 | -0.44739200 | H | -8.88178100 | -2.44573800 | -0.38770100 | H | -8.91918600 | -2.47039200 | -0.16879600 |
| H | -7.63818000 | -4.67180200 | -0.41604900 | H | -7.65840400 | -4.56926000 | -0.42916900 | H | -7.70031100 | -4.59568500 | -0.18571700 |
| H | -5.48801900 | -5.87442900 | -0.38265100 | H | -5.51307500 | -5.80024900 | -0.43368800 | H | -5.55843900 | -5.83008800 | -0.22047700 |
| H | -3.33088900 | -7.09085000 | -0.41705200 | H | -3.36150300 | -7.03798300 | -0.43558300 | H | -3.41674300 | -7.07320800 | -0.24868400 |
| C | 0.66576000  | 0.04205200  | 0.05480400  | C | 0.69589200  | 0.05769200  | -0.22922500 | C | 0.64708200  | -0.00284600 | -0.37861100 |
| O | -1.16355200 | 0.63769800  | 1.56162900  | O | -0.79634200 | 0.13203800  | 1.69260800  | O | -0.12554400 | 1.24466400  | 2.56360200  |
| S | 1.22262000  | -0.84429700 | 3.63414400  | S | 0.17721000  | -0.63911500 | 3.14362600  | S | 0.48346200  | 0.01433200  | 2.96124000  |
| O | 0.90819200  | 0.73547100  | 3.38762600  | O | 1.45314000  | 0.35862300  | 2.89496700  | O | 2.04694100  | 0.08724600  | 2.65560400  |
| O | 0.33789100  | -1.56424500 | 2.71587900  | O | 0.54276700  | -1.95676700 | 2.63017500  | O | -0.01966000 | -1.25963700 | 2.53673100  |
| O | 2.72676400  | -0.85509400 | 3.01113000  | O | 0.47740200  | -0.79723400 | 4.77511000  | O | 0.55713200  | 0.00470300  | 4.55124100  |
| H | 2.72496100  | -0.52908400 | 2.09595800  | H | 1.12099600  | -1.51540500 | 4.87012900  | H | 0.63822300  | -0.90853000 | 4.85808600  |
| H | 0.15911700  | 0.81801500  | 2.75987200  | H | 1.17902300  | 0.94987500  | 2.18109600  | H | 2.20757100  | 0.61228900  | 1.85237400  |

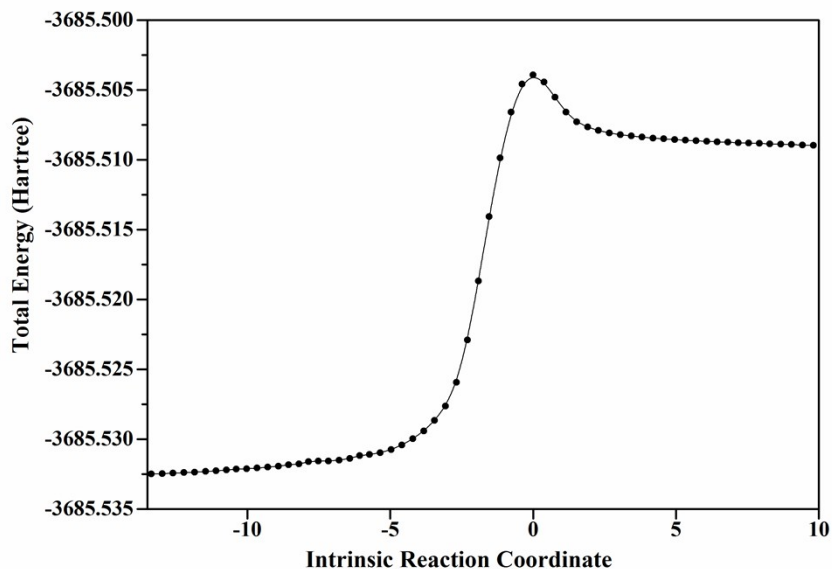

Fig. S1 IRC path of the first reaction step for SO<sub>2</sub> oxidation.

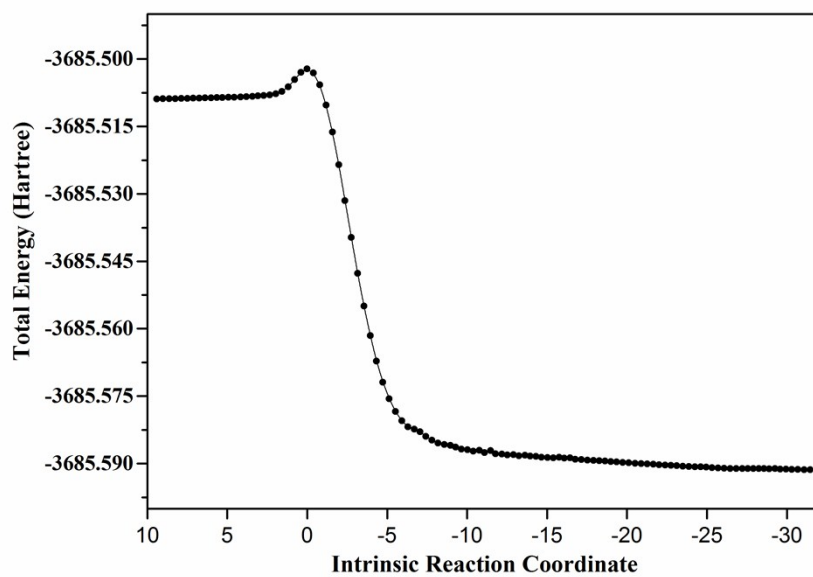

Fig. S2 IRC path of the second reaction step for SO<sub>2</sub> oxidation.

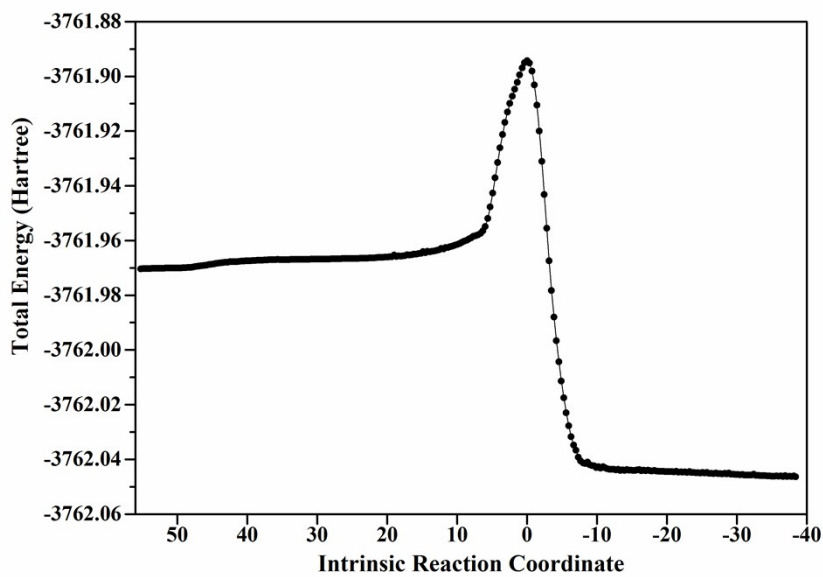

Fig. S3 IRC path for H<sub>2</sub>SO<sub>3</sub> oxidation.
